# Supplementary material for: Structures and Spectroscopic Properties of Polysulfide Radical Anions: A Theoretical Perspective
Source: MDPI journal article supplement (doi:10.3390/molecules28155654), 2023-07-26
Supplement: s1 [file s1]

## Supporting Information

### Structures and Spectroscopic Properties of Polysulfide Radical Anions: A Theoretical Perspective

Tristram Chivers<sup>1\*</sup> and Richard T. Oakley<sup>2\*</sup>

<sup>1</sup>Department of Chemistry, University of Calgary, Calgary, Alberta T2N 1N4, Canada

<sup>2</sup>Department of Chemistry, University of Waterloo, Waterloo, Ontario N2L 3G1, Canada

\*E-mail: chivers@ucalgary.ca (TC) and oakley@uwaterloo.ca (RTO)

#### Contents (21 pages total)

|                                                                                                |             |
|------------------------------------------------------------------------------------------------|-------------|
| <b>Figure S1</b> Optimized geometrical parameters in gas phase and with PCM                    | Page S2     |
| <b>Table S1</b> Total electronic energies for $S_n^{\bullet-}$ ( $n = 2 - 8$ )                 | Page S3     |
| <b>Table S2</b> Excitation energies, oscillator strengths and orbital contributions            | Pages S4-S6 |
| <b>Table S3</b> Gaussian archive entries for $S_2^{\bullet-}$ and $S_3^{\bullet-}$             | Page S7     |
| <b>Table S4</b> Gaussian archive entries for $S_4^{\bullet-}$                                  | Page S8     |
| <b>Table S5</b> Gaussian archive entries for $S_4^{\bullet-}$ and $S_5^{\bullet-}$             | Page S9     |
| <b>Table S6</b> Gaussian archive entries for $S_5^{\bullet-}$                                  | Page S10    |
| <b>Table S7</b> Gaussian archive entries for $S_6^{\bullet-}$                                  | Page S11    |
| <b>Table S8</b> Gaussian archive entries for $S_6^{\bullet-}$ and $S_7^{\bullet-}$             | Page S12    |
| <b>Table S9</b> Gaussian archive entries for $S_7^{\bullet-}$                                  | Page S13    |
| <b>Table S10</b> Gaussian archive entries for $S_8^{\bullet-}$                                 | Page S14    |
| <b>Table S11</b> Gaussian archive entries for $S_8^{\bullet-}$                                 | Page S15    |
| <b>Table S12</b> Frequency calculations on $S_4^{\bullet-}$ optimizations                      | Page S16    |
| <b>Table S13</b> Frequency calculations on $S_5^{\bullet-}$ optimizations                      | Page S17    |
| <b>Table S14</b> Frequency calculations on $S_6^{\bullet-}$ optimizations                      | Page S18    |
| <b>Table S15</b> Frequency calculations on $S_7^{\bullet-}$ optimizations                      | Page S19    |
| <b>Table S16</b> Frequency calculations on $S_7^{\bullet-}$ and $S_8^{\bullet-}$ optimizations | Page S20    |
| <b>Table S17</b> Frequency calculations on $S_8^{\bullet-}$ optimizations                      | Page S21    |

**Figure S1** Optimized geometrical parameters in gas phase and with PCM

Numbers in regular text (black) are from UPBE0/D3/def2-QZVP gas phase optimizations. Numbers in parenthesis (red) refer to UPBE0/D3/def2-QZVP optimizations with (PCM=DMF) runs.

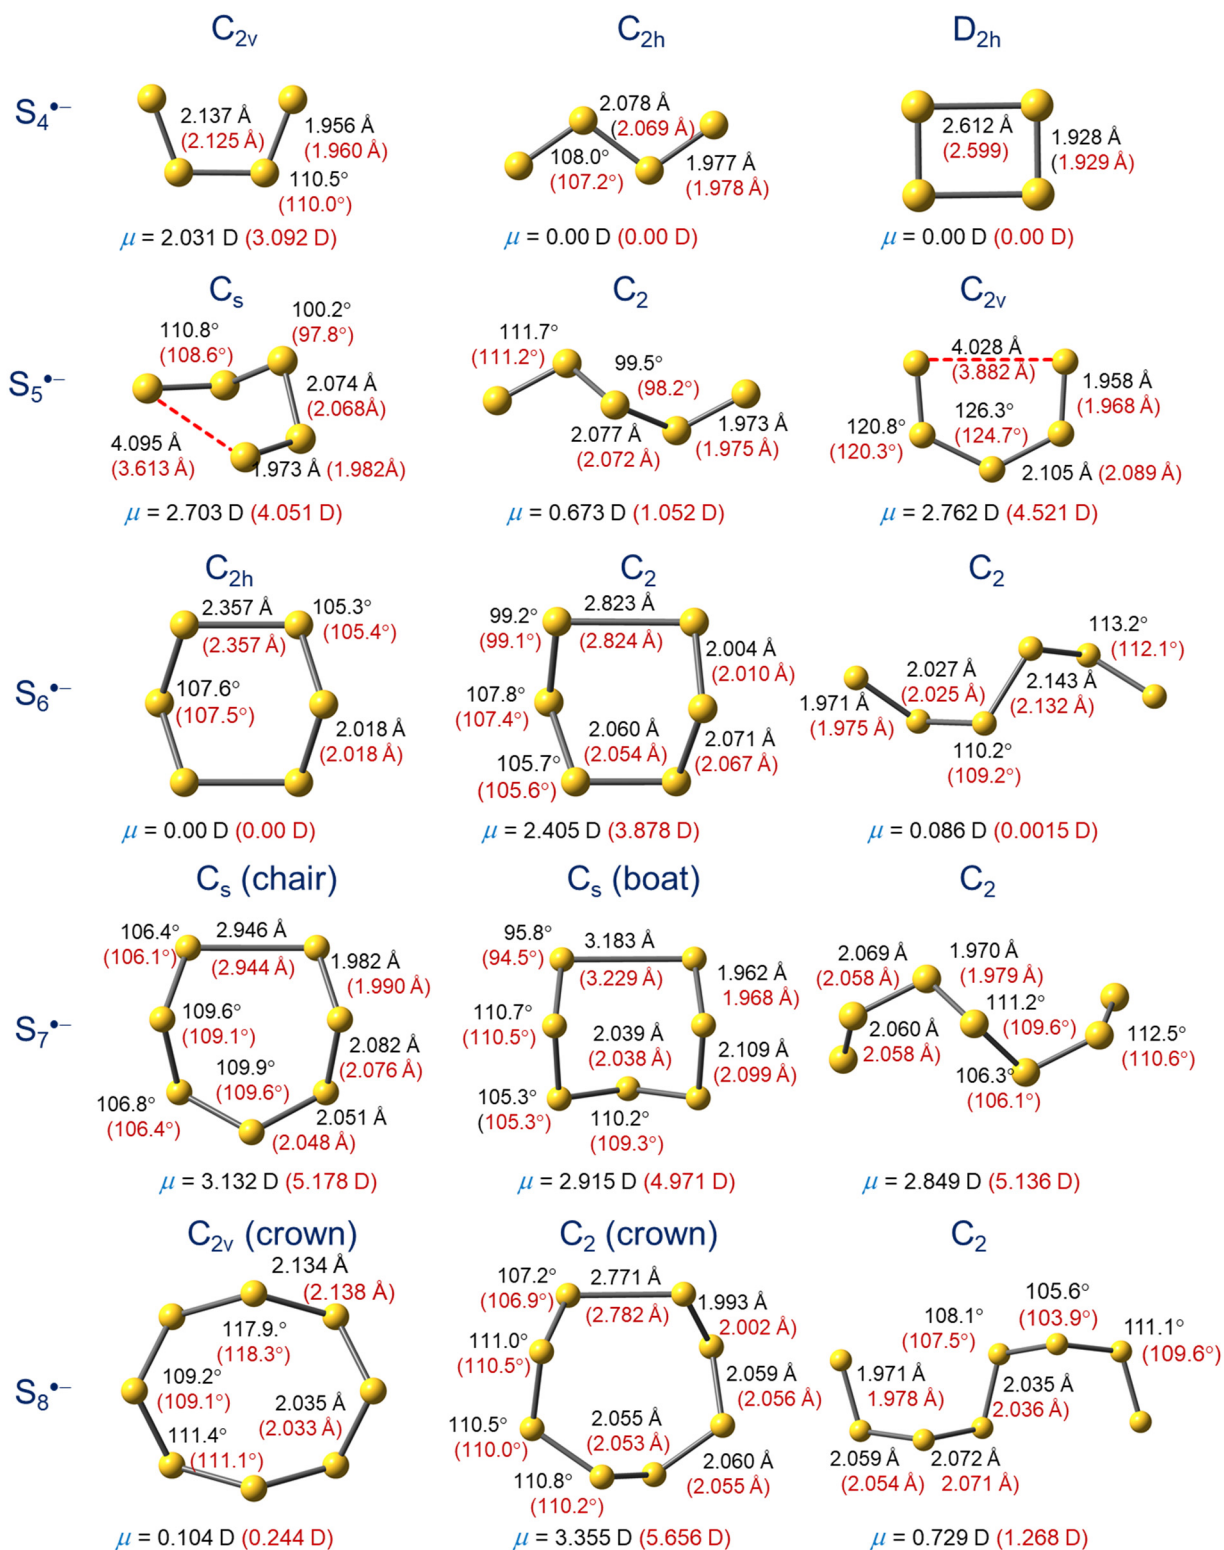

**Table S1** Total electronic energies for  $S_n^{\bullet-}$  ( $n = 2 - 8$ )

Method 1: (U)PBE0/D3/Def2-QZVP optimization

Method 2: (U)PBE0/D3/PCM/Def2-QZVP optimization with PCM = DMF

| Anion            | Geometry              | Method 1             |                                          | Method 2             |                                          |
|------------------|-----------------------|----------------------|------------------------------------------|----------------------|------------------------------------------|
|                  |                       | $E_{\text{tot}}$ (H) | $E_{\text{rel}}$ (kJ mol <sup>-1</sup> ) | $E_{\text{tot}}$ (H) | $E_{\text{rel}}$ (kJ mol <sup>-1</sup> ) |
| $S_2^{\bullet-}$ | D <sub>∞h</sub>       | -796.19689196        |                                          | -796.28981245        |                                          |
|                  |                       |                      |                                          |                      |                                          |
| $S_3^{\bullet-}$ | C <sub>2v</sub>       | -1194.31425530       |                                          | -1194.39732054       |                                          |
|                  |                       |                      |                                          |                      |                                          |
| $S_4^{\bullet-}$ | C <sub>2v</sub>       | -1592.40394686       | 0.00                                     | -1592.48316274       | 0.00                                     |
| $S_4^{\bullet-}$ | C <sub>2h</sub>       | -1592.40443155       | -1.27                                    | -1592.47941766       | 9.83                                     |
| $S_4^{\bullet-}$ | D <sub>2h</sub>       | -1592.39459386       | 24.56                                    | -1592.47161007       | 30.33                                    |
|                  |                       |                      |                                          |                      |                                          |
| $S_5^{\bullet-}$ | C <sub>s</sub>        | -1990.49240983       | 0.00                                     | -1990.56727523       | 0.00                                     |
| $S_5^{\bullet-}$ | C <sub>2</sub>        | -1990.49239966       | 0.03                                     | -1990.56242578       | 12.73                                    |
| $S_5^{\bullet-}$ | C <sub>2v</sub>       | -1990.46601665       | 69.30                                    | -1990.54011035       | 71.32                                    |
|                  |                       |                      |                                          |                      |                                          |
| $S_6^{\bullet-}$ | C <sub>2h</sub>       | -2388.57866510       | 22.51                                    | -2388.64842243       | 27.11                                    |
| $S_6^{\bullet-}$ | C <sub>2</sub> chair  | -2388.58724020       | 0.00                                     | -2388.65874675       | 0.00                                     |
| $S_6^{\bullet-}$ | C <sub>2</sub> chain  | -2388.58760293       | -0.95                                    | -2388.65349016       | 13.80                                    |
|                  |                       |                      |                                          |                      |                                          |
| $S_7^{\bullet-}$ | C <sub>s</sub> chair  | -2786.68613154       | 0.00                                     | -2786.75475259       | 0.00                                     |
| $S_7^{\bullet-}$ | C <sub>2</sub> boat   | -2786.68401462       | 5.56                                     | -2786.75341901       | 3.50                                     |
| $S_7^{\bullet-}$ | C <sub>2</sub> chain  | -2786.67605005       | 26.47                                    | -2786.74027237       | 38.02                                    |
|                  |                       |                      |                                          |                      |                                          |
| $S_8^{\bullet-}$ | C <sub>2v</sub> crown | -3184.77471500       | 20.60                                    | -3184.83755865       | 28.62                                    |
| $S_8^{\bullet-}$ | C <sub>2</sub> crown  | -3184.78255934       | 0.00                                     | -3184.84845949       | 0.00                                     |
| $S_8^{\bullet-}$ | C <sub>2</sub> chain  | -3184.77026941       | 32.27                                    | -3184.83195815       | 43.32                                    |

**Table S2** Excitation energies, oscillator strengths and orbital contributions.

From single point TD-U $\omega$ B97XD/def2-QZVP (PCM=DMF) runs, with geometries taken from UPBE0/D3/def2-QZVP (PCM=DMF) optimizations.

**S<sub>2</sub><sup>•−</sup> radical anion in D<sub>∞h</sub> symmetry**

|               |    |                      |           |           |          |                |
|---------------|----|----------------------|-----------|-----------|----------|----------------|
| Excited State | 2: | 1.996-SGU            | 3.1769 eV | 390.27 nm | f=0.0891 | <S**2>=0.746   |
|               |    | <b>15B -&gt; 17B</b> |           |           |          | <b>0.98226</b> |

**S<sub>3</sub><sup>•−</sup> radical anion in C<sub>2v</sub> symmetry**

|               |    |                      |           |           |          |                |
|---------------|----|----------------------|-----------|-----------|----------|----------------|
| Excited State | 3: | 2.004-B2             | 2.0591 eV | 602.14 nm | f=0.0920 | <S**2>=0.754   |
|               |    | <b>24B -&gt; 25B</b> |           |           |          | <b>0.98594</b> |

**S<sub>4</sub><sup>•−</sup> radical anion in C<sub>2v</sub> symmetry**

|               |    |                      |           |           |          |                |
|---------------|----|----------------------|-----------|-----------|----------|----------------|
| Excited State | 1: | 2.002-B2             | 1.2420 eV | 998.30 nm | f=0.0722 | <S**2>=0.752   |
|               |    | 31A -> 34A           |           |           |          | 0.14900        |
|               |    | 31B -> 34B           |           |           |          | 0.11138        |
|               |    | <b>32B -&gt; 33B</b> |           |           |          | <b>0.99023</b> |
|               |    | 32B <- 33B           |           |           |          | 0.10921        |
| Excited State | 8: | 2.031-A1             | 3.5327 eV | 350.96 nm | f=0.0286 | <S**2>=0.782   |
|               |    | 30A -> 34A           |           |           |          | 0.23376        |
|               |    | <b>29B -&gt; 33B</b> |           |           |          | <b>0.96065</b> |

**S<sub>4</sub><sup>•−</sup> radical anion in C<sub>2h</sub> symmetry**

|               |    |                      |           |            |          |                |
|---------------|----|----------------------|-----------|------------|----------|----------------|
| Excited State | 1: | 2.001-BU             | 0.9541 eV | 1299.48 nm | f=0.0930 | <S**2>=0.751   |
|               |    | 31A -> 34A           |           |            |          | 0.12643        |
|               |    | <b>32B -&gt; 33B</b> |           |            |          | <b>0.99839</b> |
|               |    | 32B <- 33B           |           |            |          | 0.14441        |
| Excited State | 8: | 2.016-AG             | 3.5775 eV | 346.57 nm  | f=0.0000 | <S**2>=0.766   |
|               |    | 30A -> 34A           |           |            |          | 0.13054        |
|               |    | <b>29B -&gt; 33B</b> |           |            |          | <b>0.97995</b> |

**S<sub>5</sub><sup>•−</sup> radical anion in C<sub>2v</sub> symmetry**

|               |     |                      |           |            |          |                |
|---------------|-----|----------------------|-----------|------------|----------|----------------|
| Excited State | 1:  | 2.001-B2             | 0.7157 eV | 1732.25 nm | f=0.0734 | <S**2>=0.751   |
|               |     | 39A -> 42A           |           |            |          | 0.11472        |
|               |     | <b>40B -&gt; 41B</b> |           |            |          | <b>1.00686</b> |
|               |     | 40B <- 41B           |           |            |          | 0.19077        |
| Excited State | 8:  | 2.054-A1             | 2.5833 eV | 479.94 nm  | f=0.0322 | <S**2>=0.805   |
|               |     | 38A -> 42A           |           |            |          | -0.18566       |
|               |     | 39A -> 43A           |           |            |          | 0.22566        |
|               |     | <b>38B -&gt; 41B</b> |           |            |          | <b>0.94657</b> |
| Excited State | 13: | 2.009-B2             | 3.5186 eV | 352.37 nm  | f=0.1258 | <S**2>=0.759   |
|               |     | 39A -> 42A           |           |            |          | 0.67401        |
|               |     | 39B -> 42B           |           |            |          | 0.71565        |
|               |     | 40B -> 41B           |           |            |          | -0.12458       |

**Table S2 (cont'd).** Excitation energies, oscillator strengths and orbital contributions.

From single point TD-U $\omega$ B97XD/D3/def2-QZVP (PCM=DMF) runs, with geometries taken from UPBE0/D3/def2-QZVP (PCM=DMF) optimizations.

**S<sub>5</sub><sup>•-</sup> radical anion in C<sub>s</sub> symmetry**

|                      |    |                |           |            |          |              |
|----------------------|----|----------------|-----------|------------|----------|--------------|
| Excited State        | 1: | 1.992-A''      | 0.6851 eV | 1809.61 nm | f=0.0589 | <S**2>=0.742 |
| 38B -> 41B           |    | 0.15204        |           |            |          |              |
| <b>40B -&gt; 41B</b> |    | <b>0.98847</b> |           |            |          |              |
| 40B <- 41B           |    | 0.13772        |           |            |          |              |
| Excited State        | 3: | 2.016-A''      | 1.9397 eV | 639.21 nm  | f=0.0540 | <S**2>=0.766 |
| <b>38B -&gt; 41B</b> |    | <b>0.97837</b> |           |            |          |              |
| 40B -> 41B           |    | -0.14627       |           |            |          |              |
| Excited State        | 4: | 2.018-A''      | 2.6529 eV | 467.36 nm  | f=0.0158 | <S**2>=0.768 |
| <b>37B -&gt; 41B</b> |    | <b>0.99220</b> |           |            |          |              |
| Excited State        | 6: | 3.137-A''      | 3.0996 eV | 400.00 nm  | f=0.0155 | <S**2>=2.210 |
| 39A -> 42A           |    | 0.11176        |           |            |          |              |
| 40A -> 43A           |    | -0.39324       |           |            |          |              |
| 41A -> 42A           |    | -0.43053       |           |            |          |              |
| 39B -> 43B           |    | -0.11814       |           |            |          |              |
| 40B -> 42B           |    | 0.75729        |           |            |          |              |
| Excited State        | 8: | 2.077-A'       | 3.3776 eV | 367.08 nm  | f=0.0173 | <S**2>=0.828 |
| 40A -> 42A           |    | -0.16491       |           |            |          |              |
| 40A -> 44A           |    | -0.10643       |           |            |          |              |
| 41A -> 43A           |    | -0.62120       |           |            |          |              |
| 36B -> 41B           |    | 0.64592        |           |            |          |              |
| 40B -> 43B           |    | -0.33696       |           |            |          |              |
| Excited State        | 9: | 2.070-A'       | 3.4362 eV | 360.82 nm  | f=0.0173 | <S**2>=0.822 |
| 40A -> 42A           |    | 0.20033        |           |            |          |              |
| 41A -> 43A           |    | 0.48403        |           |            |          |              |
| 36B -> 41B           |    | 0.73208        |           |            |          |              |
| 40B -> 43B           |    | 0.36905        |           |            |          |              |

**S<sub>6</sub><sup>•-</sup> radical anion in C<sub>2h</sub> symmetry**

|                      |     |                |           |            |          |              |
|----------------------|-----|----------------|-----------|------------|----------|--------------|
| Excited State        | 1:  | 1.991-AU       | 1.2308 eV | 1007.33 nm | f=0.0445 | <S**2>=0.741 |
| <b>49A -&gt; 50A</b> |     | <b>0.99789</b> |           |            |          |              |
| 49A <- 50A           |     | 0.12508        |           |            |          |              |
| Excited State        | 11: | 2.072-BU       | 3.3234 eV | 373.06 nm  | f=0.0057 | <S**2>=0.824 |
| 46A -> 50A           |     | -0.14764       |           |            |          |              |
| 49A -> 53A           |     | 0.95944        |           |            |          |              |
| 49A -> 57A           |     | -0.10894       |           |            |          |              |
| 47B -> 49B           |     | -0.12823       |           |            |          |              |
| Excited State        | 13: | 2.810-BU       | 3.6411 eV | 340.51 nm  | f=0.0212 | <S**2>=1.724 |
| 46A -> 50A           |     | 0.81317        |           |            |          |              |
| 48A -> 50A           |     | -0.23972       |           |            |          |              |
| 49A -> 53A           |     | 0.11641        |           |            |          |              |
| 43B -> 49B           |     | 0.16183        |           |            |          |              |
| 45B -> 50B           |     | -0.15458       |           |            |          |              |
| 48B -> 50B           |     | -0.45490       |           |            |          |              |

**Table S2 (cont'd).** Excitation energies, oscillator strengths and orbital contributions.

From single point TD-U $\omega$ B97XD/D3/def2-QZVP (PCM=DMF) runs, with geometries taken from UPBE0/D3/def2-QZVP (PCM=DMF) optimizations.

**S<sub>6</sub><sup>•-</sup> radical anion in C<sub>2</sub> symmetry**

|                      |    |                |           |           |          |              |
|----------------------|----|----------------|-----------|-----------|----------|--------------|
| Excited State        | 1: | 2.009-B        | 1.4946 eV | 829.57 nm | f=0.0611 | <S**2>=0.759 |
| 45B -> 49B           |    | 0.11135        |           |           |          |              |
| 46B -> 49B           |    | 0.15768        |           |           |          |              |
| <b>48B -&gt; 49B</b> |    | <b>0.96994</b> |           |           |          |              |
| Excited State        | 3: | 2.014-B        | 2.2827 eV | 543.14 nm | f=0.0308 | <S**2>=0.764 |
| 45B -> 49B           |    | 0.31320        |           |           |          |              |
| <b>46B -&gt; 49B</b> |    | <b>0.91568</b> |           |           |          |              |
| 48B -> 49B           |    | -0.17920       |           |           |          |              |

**S<sub>7</sub><sup>•-</sup> radical anion in C<sub>2</sub> (chair) symmetry**

|                      |    |                |           |           |          |              |
|----------------------|----|----------------|-----------|-----------|----------|--------------|
| Excited State        | 1: | 2.001-A"       | 1.7494 eV | 708.74 nm | f=0.1637 | <S**2>=0.751 |
| <b>56B -&gt; 57B</b> |    | <b>0.97968</b> |           |           |          |              |
| Excited State        | 7: | 2.809-A"       | 3.4656 eV | 357.75 nm | f=0.0225 | <S**2>=1.723 |
| 57A -> 58A           |    | 0.26737        |           |           |          |              |
| 57A -> 62A           |    | -0.23110       |           |           |          |              |
| 55B -> 60B           |    | -0.13143       |           |           |          |              |
| 56B -> 59B           |    | 0.88297        |           |           |          |              |

**S<sub>7</sub><sup>•-</sup> radical anion in C<sub>2</sub> (boat) symmetry**

|                      |    |                |           |           |          |              |
|----------------------|----|----------------|-----------|-----------|----------|--------------|
| Excited State        | 1: | 1.996-A"       | 1.4352 eV | 863.85 nm | f=0.1729 | <S**2>=0.746 |
| <b>56B -&gt; 57B</b> |    | <b>0.98414</b> |           |           |          |              |
| Excited State        | 5: | 2.022-A'       | 2.8513 eV | 434.83 nm | f=0.0194 | <S**2>=0.772 |
| 50B -> 57B           |    | -0.11398       |           |           |          |              |
| 53B -> 57B           |    | 0.97068        |           |           |          |              |

**S<sub>8</sub><sup>•-</sup> radical anion in C<sub>2</sub> (crown) symmetry**

|                      |    |                |           |           |          |              |
|----------------------|----|----------------|-----------|-----------|----------|--------------|
| Excited State        | 1: | 2.008-B        | 2.1041 eV | 589.26 nm | f=0.1551 | <S**2>=0.758 |
| 65A -> 67A           |    | -0.15189       |           |           |          |              |
| 62B -> 65B           |    | 0.13497        |           |           |          |              |
| <b>64B -&gt; 65B</b> |    | <b>0.95105</b> |           |           |          |              |
| 64B -> 66B           |    | -0.11627       |           |           |          |              |
| Excited State        | 4: | 2.215-B        | 2.6136 eV | 474.38 nm | f=0.0299 | <S**2>=0.976 |
| 64A -> 66A           |    | -0.11251       |           |           |          |              |
| 64A -> 68A           |    | -0.22211       |           |           |          |              |
| 65A -> 67A           |    | 0.80388        |           |           |          |              |
| 65A -> 70A           |    | -0.10951       |           |           |          |              |
| 65A -> 71A           |    | -0.17883       |           |           |          |              |
| 62B -> 65B           |    | -0.38543       |           |           |          |              |
| 64B -> 65B           |    | 0.19873        |           |           |          |              |

**Table S3** Gaussian archive entries for  $S_2^{\bullet-}$  and  $S_3^{\bullet-}$

**UPBE0/D3/Def2-QZVP geometry optimization for  $S_2^{\bullet-}$  in  $D_{\infty h}$ .**

```
1|1|UNPC-DESKTOP-3H3V0JT|FOpt|UPBE1PBE|def2QZVP|S2(1-,2)|HOME|24-Apr-2023|0||# upbelpbe/def2qzvp geom=connectivity opt empiricaldispersion=gd3||upbelpbe/D3/def2qzvp S2- radical anion full optimization with GD3||-1,2|S,0.,0.,0.9981817674|S,0.,0.,-0.9981817674||Version=EM64W-G16RevB.01|HF=-796.196892|S2=0.756628|S2-1=0.|S2A=0.750029|RMSD=4.293e-009|RMSF=8.026e-007|Dipole=0.,0.,0.|Quadrupole=2.1285549,-0.0342475,-2.0943074,0.,0.,0.|PG=D*H [C*(S1.S1)]||@
```

**UPBE0/D3/Def2-QZVP geometry optimization for  $S_2^{\bullet-}$  in  $D_{\infty h}$  with PCM=DMF.**

```
1|1|UNPC-DESKTOP-3H3V0JT|FOpt|UPBE1PBE|def2QZVP|S2(1-,2)|HOME|24-Apr-2023|0||# opt upbelpbe/def2qzvp scrf=(solvent=n,n-dimethylformamide,pcm) geom=connectivity empiricaldispersion=gd3||upbelpbe/D3/def2qzvp S2- radical anion full optimization in DMF||-1,2|S,0.,0.,0.99720439|S,0.,0.,-0.99720439||Version=EM64W-G16RevB.01|HF=-796.2898124|S2=0.756667|S2-1=0.|S2A=0.75003|RMSD=3.095e-009|RMSF=2.241e-005|Dipole=0.,0.,0.|Quadrupole=1.986247,-0.26987,-1.7163769,0.,0.,0.|PG=D*H [C*(S1.S1)]||@
```

**UPBE0/D3/Def2-QZVP geometry optimization for  $S_3^{\bullet-}$  in  $C_{2v}$ .**

```
1|1|UNPC-DESKTOP-3H3V0JT|FOpt|UPBE1PBE|def2QZVP|S3(1-,2)|HOME|24-Apr-2023|0||# opt geom=connectivity def2qzvp upbelpbe empiricaldispersion=gd3||upbelpbe/D3/def2qzvp S3- radical anion C2v full optimization||-1,2|S,0.,-1.6790965754,-0.3520910246|S,0.,1.6790965754,-0.3520910246|S,0.,0.,0.7041663992||Version=EM64W-G16RevB.01|State=2-B1|HF=-1194.3142553|S2=0.756108|S2-1=0.|S2A=0.750031|RMSD=9.448e-009|RMSF=4.959e-005|Dipole=0.,0.,0.4003634|Quadrupole=3.6484154,-6.2676459,2.6192305,0.,0.,0.|PG=C02V [C2(S1),SGV(S2)]||@
```

**UPBE0/D3/Def2-QZVP geometry optimization for  $S_3^{\bullet-}$  in  $C_{2v}$  with PCM=DMF.**

```
1|1|UNPC-DESKTOP-3H3V0JT|FOpt|UPBE1PBE|def2QZVP|S3(1-,2)|HOME|24-Apr-2023|0||# opt geom=connectivity def2qzvp upbelpbe empiricaldispersion=gd3 scrf=(solvent=n,n-dimethylformamide,pcm)||upbelpbe/D3/def2qzvp S3- radical anion C2v full optimization with PCM (DMF)||-1,2|S,0.,-1.6669713629,-0.3577928024|S,0.,1.6669713629,-0.3577928024|S,0.,0.,0.7155699548||Version=EM64W-G16RevB.01|State=2-B1|HF=-1194.3973205|S2=0.7561|S2-1=0.|S2A=0.750031|RMSD=9.868e-009|RMSF=1.838e-005|Dipole=0.,0.,0.5388215|Quadrupole=3.3374583,-5.8190681,2.4816098,0.,0.,0.|PG=C02V [C2(S1),SGV(S2)]||@
```

**Table S4** Gaussian archive entries for  $S_4^{\bullet-}$

**UPBE0/D3/Def2-QZVP geometry optimization for  $S_4^{\bullet-}$  in  $C_{2v}$ .**

```
1|1|UNPC-DESKTOP-3H3V0JT|FOpt|UPBE1PBE|def2QZVP|S4(1-,2)|HOME|24-Apr-2023|0||# opt geom=connectivity def2qzvp upbelpbe empiricaldispersion=gd3||upbelpbe/D3/def2qzvp S4- radical anion with C2v optimization and D3||-1,2|S,0.,1.752493898,-0.9159957794|S,0.,1.0684059939,0.9159957794|S,0.,-1.0684059939,0.9159957794|S,0.,-1.752493898,-0.9159957794||Version=EM64W-G16RevB.01|State=2-A2|HF=-1592.4039469|S2=0.755478|S2-1=0.|S2A=0.750027|RMSD=6.257e-009|RMSF=7.018e-005|Dipole=0.,0.,0.7988865|Quadrupole=3.9904833,-6.6228027,2.6323194,0.,0.,0.|PG=C02V [SGV(S4)]||@
```

**UPBE0/D3/Def2-QZVP geometry optimization for  $S_4^{\bullet-}$  in  $C_{2v}$  with PCM=DMF.**

```
1|1|UNPC-DESKTOP-3H3V0JT|FOpt|UPBE1PBE|def2QZVP|S4(1-,2)|HOME|24-Apr-2023|0||# opt geom=connectivity def2qzvp empiricaldispersion=gd3 upbelpbe scrf=(solvent=n,n-dimethylformamide,pcm)||upbelpbe/D3/def2qzvp S4- radical anion with C2v optimization and PCM (DMF)||-1,2|S,0.,1.7321884376,0.9209258568|S,0.,1.0623444266,-0.9209258568|S,0.,-1.0623444266,-0.9209258568|S,0.,-1.7321884376,0.9209258568||Version=EM64W-G16RevB.01|State=2-A2|HF=-1592.4831627|S2=0.755454|S2-1=0.|S2A=0.750027|RMSD=9.210e-009|RMSF=9.375e-005|Dipole=0.,0.,-1.2163231|Quadrupole=3.5086595,-6.3168033,2.8081439,0.,0.,0.|PG=C02V [SGV(S4)]||@
```

**UPBE0/D3/Def2-QZVP geometry optimization for  $S_4^{\bullet-}$  in  $C_{2h}$ .**

```
1|1|UNPC-DESKTOP-3H3V0JT|FOpt|UPBE1PBE|def2QZVP|S4(1-,2)|HOME|24-Apr-2023|0||# opt geom=connectivity def2qzvp upbelpbe empiricaldispersion=gd3||upbelpbe/D3/def2qzvp S4- radical anion C2h optimization||-1,2|S,2.4923813246,-0.2159949453,0.|S,0.7505302839,0.718752841,0.|S,-0.7505302839,-0.718752841,0.|S,-2.4923813246,0.2159949453,0.||Version=EM64W-G16RevB.01|State=2-BG|HF=-1592.4044316|S2=0.75517|S2-1=0.|S2A=0.750024|RMSD=9.916e-009|RMSF=1.451e-004|Dipole=0.,0.,0.|Quadrupole=-12.8086829,6.4421333,6.3665496,0.7816953,0.,0.|PG=C02H [SGH(S4)]||@
```

**UPBE0/D3/Def2-QZVP geometry optimization for  $S_4^{\bullet-}$  in  $C_{2h}$  with PCM=DMF.**

```
1|1|UNPC-DESKTOP-3H3V0JT|FOpt|UPBE1PBE|def2QZVP|S4(1-,2)|HOME|24-Apr-2023|0||# opt geom=connectivity def2qzvp empiricaldispersion=gd3 upbelpbe scrf=(solvent=n,n-dimethylformamide,pcm)||upbelpbe/D3/def2qzvp S4- radical anion C2h optimization with PCM (DMF)||-1,2|S,-0.2196403823,2.4789785868,0.|S,0.7228921786,0.7400302184,0.|S,-0.7228921786,-0.7400302184,0.|S,0.2196403823,-2.4789785868,0.||Version=EM64W-G16RevB.01|State=2-BG|HF=-1592.4794177|S2=0.755196|S2-1=0.|S2A=0.750024|RMSD=5.832e-009|RMSF=1.871e-005|Dipole=0.,0.,0.|Quadrupole=6.4813058,-12.5616565,6.0803506,0.9820079,0.,0.|PG=C02H [SGH(S4)]||@
```



**Table S5** Gaussian archive entries for  $S_4^{\bullet-}$  and  $S_5^{\bullet-}$

**UPBE0/D3/Def2-QZVP geometry optimization for  $S_4^{\bullet-}$  in  $D_{2h}$ .**

```
1|1|UNPC-DESKTOP-3H3V0JT|FOpt|UPBE1PBE|def2QZVP|S4(1-,2)|HOME|10-May-2023|0||# opt geom=connectivity def2qzvp empiricaldispersion=gd3 upbelpbe||upbelpbe/D3/def2qzvp rectangular S4- radical anion with D2h full optimization||-1,2|S,0.,0.96424717,1.30579883|S,0.,-0.96424717,1.30579883|S,0.,-0.96424717,-1.30579883|S,0.,0.96424717,-1.30579883||Version=EM64W-G16RevB.01|State=2-AU|HF=-1592.3945939|S2=0.755016|S2-1=0.|S2A=0.750023|RMSD=2.158e-009|RMSF=1.608e-004|Dipole=0.,0.,0.|Quadrupole=2.9327461,2.1681393,-5.1008854,0.,0.,0.|PG=D02H [SG(S4)]||@
```

**UPBE0/D3/Def2-QZVP geometry optimization for  $S_4^{\bullet-}$  in  $D_{2h}$  with PCM=DMF.**

```
1|1|UNPC-DESKTOP-3H3V0JT|FOpt|UPBE1PBE|def2QZVP|S4(1-,2)|HOME|24-Apr-2023|0||# opt geom=connectivity def2qzvp upbelpbe scrf=(solvent=n,n-dimethylformamide,pcm)||upbelpbe/D3/def2qzvp rectangular S4- radical anion with D2h optimization and PCM (DMF)||-1,2|S,0.,0.9645557579,1.2995335457|S,0.,-0.9645557579,1.2995335457|S,0.,-0.9645557579,-1.2995335457|S,0.,0.9645557579,-1.2995335457||Version=EM64W-G16RevB.01|State=2-AU|HF=-1592.4716101|S2=0.755011|S2-1=0.|S2A=0.750023|RMSD=8.509e-009|RMSF=2.168e-005|Dipole=0.,0.,0.|Quadrupole=2.4286483,2.5159367,-4.944585,0.,0.,0.|PG=D02H [SG(S4)]||@
```

**UPBE0/D3/Def2-QZVP geometry optimization for  $S_5^{\bullet-}$  in  $C_s$ .**

```
1|1|UNPC-DESKTOP-3H3V0JT|FOpt|UPBE1PBE|def2QZVP|S5(1-,2)|HOME|10-May-2023|0||# opt geom=connectivity def2qzvp empiricaldispersion=gd3 upbelpbe||upbelpbe/D3/def2-qzvp tent S5- radical anion in Cs symmetry gas phase||-1,2|S,0.45414612,-0.58101407,1.59177237|S,-0.13222088,1.24690104,2.04744117|S,0.45414612,-0.58101407,-1.59177237|S,-0.13222088,1.24690104,-2.04744117|S,-0.64385048,-1.33177394,0.||Version=EM64W-G16RevB.01|State=2-A|HF=-1990.4924098|S2=0.763479|S2-1=0.|S2A=0.750094|RMSD=6.071e-009|RMSF=4.839e-006|Dipole=0.0701124,-1.0610119,0.|Quadrupole=5.3885542,1.819489,-7.2080432,-0.1503546,0.,0.|PG=CS [SG(S1),X(S4)]||@
```

**UPBE0/D3/Def2-QZVP geometry optimization for  $S_5^{\bullet-}$  in  $C_s$  with PCM=DMF.**

```
1|1|UNPC-TABLET|FOpt|UPBE1PBE|def2QZVP|S5(1-,2)|USER|23-Apr-2023|0||# opt upbelpbe/def2qzvp scrf=(solvent=n,n-dimethylformamide,pcm) geom=connectivity empiricaldispersion=gd3||upbelpbe/D3/def2-qzvp tent S5- radical anion cs symmetry with PCM (DMF)||-1,2|S,0.2546682419,-0.6933079344,1.5583928895|S,0.2565512722,1.273322502,1.8068222326|S,0.2546682419,-0.6933079344,-1.5583928895|S,0.2565512722,1.273322502,-1.8068222326|S,-1.0224390481,-1.1600286215,0.||Version=EM64W-G16RevB.01|State=2-A|HF=-1990.5672752|S2=0.759985|S2-1=0.|S2A=0.750064|RMSD=7.297e-009|RMSF=5.155e-005|Dipole=-0.385059,-1.5464737,0.|Quadrupole=3.9057306,1.3151089,-5.2208394,-0.9316932,0.,0.|PG=CS [SG(S1),X(S4)]||@
```

**Table S6** Gaussian archive entries for  $S_5^-$

**UPBE0/D3/Def2-QZVP geometry optimization for  $S_5^-$  in  $C_{2v}$ .**

```
1|1|UNPC-DESKTOP-3H3V0JT|FOpt|UPBE1PBE|def2QZVP|S5(1-,2)|HOME|10-May-2023|0||# opt geom=connectivity def2qzvp empiricaldispersion=gd3 upbelpbe||upbelpbe/D3/def2-qzvp flat S5- radical anion in C2v symmetry gas phase||-1,2|S,0.,1.87816634,0.59131135|S,0.,2.0138601,-1.36186062|S,0.,-1.87816634,0.59131135|S,0.,-2.0138601,-1.36186062|S,0.,0.,1.54109853|Version=EM64W-G16RevB.01|State=2-B1|HF=-1990.4660167|S2=0.754936|S2-1=0.|S2A=0.750022|RMSD=5.379e-009|RMSF=7.541e-006|Dipole=0.,0.,1.086555|Quadrupole=5.6871214,-7.4591502,1.7720288,0.,0.,0.|PG=C02V [C2(S1),SGV(S4)]||@
```

**UPBE0/D3/Def2-QZVP geometry optimization for  $S_5^-$  in  $C_{2v}$  with PCM=DMF.**

```
1|1|UNPC-DESKTOP-3H3V0JT|FOpt|UPBE1PBE|def2QZVP|S5(1-,2)|HOME|06-May-2023|0||# opt upbelpbe/def2qzvp scrf=(solvent=n,n-dimethylformamide,pcm) geom=connectivity empiricaldispersion=gd3||upbelpbe/D3/def2-qzvp flat S5- radical anion C2v symmetry with PCM (DMF)||-1,2|S,0.,1.850451829,0.592465355|S,0.,1.94114221,-1.3734750163|S,0.,-1.850451829,0.592465355|S,0.,-1.94114221,-1.3734750163|S,0.,0.,1.5620193126|Version=EM64W-G16RevB.01|State=2-B1|HF=-1990.5401103|S2=0.754974|S2-1=0.|S2A=0.750023|RMSD=5.380e-009|RMSF=1.021e-004|Dipole=0.,0.,1.7785039|Quadrupole=4.9055876,-6.6621556,1.756568,0.,0.,0.|PG=C02V [C2(S1),SGV(S4)]||@
```

**UPBE0/D3/Def2-QZVP geometry optimization for  $S_5^-$  in  $C_2$ .**

```
1|1|UNPC-DESKTOP-3H3V0JT|FOpt|UPBE1PBE|def2QZVP|S5(1-,2)|HOME|10-May-2023|0||# opt geom=connectivity def2qzvp empiricaldispersion=gd3 upbelpbe||upbelpbe/D3/def2-qzvp optimization of open chain S5- radical anion with C2symmetry||-1,2|S,0.7245687301,1.4102007199,-0.28742996|S,-0.33228954,3.07499103,-0.23942193|S,-0.7245687301,-1.4102007205,-0.2874299574|S,0.33228954,-3.0749910304,-0.2394219244|S,0.,0.000000001,1.05370378|Version=EM64W-G16RevB.01|State=2-B|HF=-1990.4923997|S2=0.761784|S2-1=0.|S2A=0.750077|RMSD=8.071e-009|RMSF=1.949e-005|Dipole=0.,0.,0.2648717|Quadrupole=9.3502923,-18.0516148,8.7013225,1.7758433,0.,0.|PG=C02 [C2(S1),X(S4)]||@
```

**UPBE0/D3/Def2-QZVP geometry optimization for  $S_5^-$  in  $C_2$  with PCM=DMF.**

```
1|1|UNPC-DESKTOP-3H3V0JT|FOpt|UPBE1PBE|def2QZVP|S5(1-,2)|HOME|23-Apr-2023|0||# opt upbelpbe/def2qzvp scrf=(solvent=n,n-dimethylformamide,pcm) geom=connectivity empiricaldispersion=gd3||upbelpbe/D3/def2-qzvp spinner S5- radical anion C2 symmetry with PCM (DMF)||-1,2|S,0.0069879517,1.5664665338,-0.2633136659|S,-1.732825209,2.500438358,-0.2829099024|S,-0.0069879517,-1.5664665338,-0.2633136659|S,1.732825209,-2.500438358,-0.2829099024|S,0.,0.,1.0924471366|Version=EM64W-G16RevB.01|State=2-B|HF=-1990.5624258|S2=0.760729|S2-1=0.|S2A=0.750068|RMSD=7.435e-009|RMSF=1.588e-005|Dipole=0.,0.,0.413872|Quadrupole=1.3267481,-9.8389511,8.5122031,12.5219607,0.,0.|PG=C02 [C2(S1),X(S4)]||@
```

## Table S7 Gaussian archive entries for $S_6^-$

### UPBE0/D3/Def2-QZVP geometry optimization for $S_6^-$ in $C_{2h}$ .

```
1|1|UNPC-DESKTOP-3H3V0JT|FOpt|UPBE1PBE|def2QZVP|S6(1-,2)|HOME|10-May-2023|0||# opt geom=connectivity def2qzvp empiricaldispersion=gd3 upbelpbe|upbelpbe/D3/def2-qzvp optimization of gas phase cyclic S6- radical anion in C2h||-1,2|S,-0.40808165,1.97474038,0.|S,0.40808165,1.10562788,1.62771064|S,-0.40808165,-1.10562788,1.62771064|S,0.40808165,-1.97474038,0.|S,-0.40808165,-1.10562788,-1.62771064|S,0.40808165,1.10562788,-1.62771064|Version=EM64W-G16RevB.01|State=2-BG|HF=-2388.5786651|S2=0.759537|S2-1=0.|S2A=0.750053|RMSD=5.585e-009|RMSF=8.650e-005|Dipole=0.,0.,0.|Quadrupole=4.3893865,-2.4616805,-1.927706,-1.2515217,0.,0.|PG=C02H [SGH(S2),X(S4)]||@
```

### UPBE0/D3/Def2-QZVP geometry optimization for $S_6^-$ in $C_{2h}$ with PCM=DMF.

```
1|1|UNPC-DESKTOP-3H3V0JT|FOpt|UPBE1PBE|def2QZVP|S6(1-,2)|HOME|22-Apr-2023|0||# opt upbelpbe/def2qzvp scrf=(solvent=n,n-dimethylformamide,pcm) geom=connectivity empiricaldispersion=gd3|upbelpbe/D3/def2-qzvp optimization of cyclic S6- radical anion in C2h - with PCM (DMF)||-1,2|S,-0.4401993833,1.9692563948,0.0000000007|S,0.3897860485,1.1120556115,1.6265897443|S,-0.3897860485,-1.1120556127,1.6265897435|S,0.4401993833,-1.9692563948,-0.0000000007|S,-0.3897860485,-1.1120556115,-1.6265897443|S,0.3897860485,1.1120556127,-1.6265897435|Version=EM64W-G16RevB.01|State=2-BG|HF=-2388.6484224|S2=0.759734|S2-1=0.|S2A=0.750055|RMSD=4.477e-009|RMSF=3.386e-005|Dipole=0.,0.,0.|Quadrupole=3.4959574,-1.8267669,-1.6691905,-1.3647346,0.,0.|PG=C02H [SGH(S2),X(S4)]||@
```

### UPBE0/D3/Def2-QZVP geometry optimization for $S_6^-$ in $C_2$ ring.

```
1|1|UNPC-DESKTOP-3H3V0JT|FOpt|UPBE1PBE|def2QZVP|S6(1-,2)|HOME|10-May-2023|0||# opt geom=connectivity def2qzvp empiricaldispersion=gd3 upbelpbe|uPBE0/D3/def2-qzvp optimization of S6- radical anion in C2 symmetry||-1,2|S,0.42706054,1.96343327,-0.04107525|S,-0.44151753,0.93080185,-1.61255511|S,0.44151753,-0.93080185,-1.61255511|S,-0.42706054,-1.96343327,-0.04107525|S,0.44151753,-1.34072018,1.65363036|S,-0.44151753,1.34072018,1.65363036|Version=EM64W-G16RevB.01|State=2-B|HF=-2388.5872402|S2=0.756255|S2-1=0.|S2A=0.750034|RMSD=6.956e-009|RMSF=4.445e-005|Dipole=0.,0.,-0.9462519|Quadrupole=4.7636203,-3.1957271,-1.5678933,1.243759,0.,0.|PG=C02 [X(S6)]||@
```

### UPBE0/D3/Def2-QZVP geometry optimization for $S_6^-$ in $C_2$ ring with PCM=DMF.

```
1|1|UNPC-DESKTOP-3H3V0JT|FOpt|UPBE1PBE|def2QZVP|S6(1-,2)|HOME|21-Apr-2023|0||# opt upbelpbe/def2qzvp geom=connectivity empiricaldispersion=gd3 scrf=(solvent=n,n-dimethylformamide,pcm)|upbelpbe/D3/def2-qzvp optimization of cyclic S6- radical anion in C2 symmetry with PCM (DMF)||-1,2|S,0.48305023,1.95030929,-0.04717171|S,-0.41937006,0.93762192,-1.60685922|S,0.41937006,-0.9376219239,-1.6068592177|S,-0.48305023,-1.9503092901,-0.0471717053|S,0.40580549,-1.35258593,1.65403093|S,-0.40580549,1.352585934,1.6540309268|Version=EM64W-G16RevB.01|State=2-B|HF=-2388.6587467|S2=0.756109|S2-1=0.|S2A=0.750032|RMSD=5.805e-009|RMSF=5.518e-005|Dipole=0.,0.,-1.5257678|Quadrupole=4.0294789,-2.7276813,-1.3017976,1.2649862,0.,0.|PG=C02 [X(S6)]||@
```

**Table S8** Gaussian archive entries for  $S_6^{\bullet-}$  and  $S_7^{\bullet-}$

**UPBE0/D3/Def2-QZVP geometry optimization for  $S_6^{\bullet-}$  in  $C_2$  open chain**

```
1|1|UNPC-DESKTOP-3H3V0JT|FOpt|UPBE1PBE|def2QZVP|S6(1-,2)|HOME|10-May-2023|0||# opt geom=connectivity def2qzvp empiricaldispersion=gd3 upbelpbe||upbelpbe/D3/def2-qzvp optimization of open chain S6- radical anion in C2 symmetry||-1,2|S,0.9467265878,-2.0032992483,-0.6659373803|S,0.9479433026,-0.4994063027,0.6924926957|S,-0.9479433026,0.4994063027,0.6924926957|S,-0.9467265878,2.0032992483,-0.6659373803|S,-0.0291086276,3.6267766067,-0.0265553155|S,0.0291086276,-3.6267766067,-0.0265553155|Version=EM64W-G16RevB.01|State=2-A|HF=-2388.5876029|S2=0.778711|S2-1=0.|S2A=0.750239|RMSD=8.585e-009|RMSF=1.821e-005|Dipole=0.,0.,-0.0338096|Quadrupole=11.6769158,-23.3443069,11.6673911,2.0280708,0.,0.|PG=C02 [X(S6)]||@
```

**UPBE0/D3/Def2-QZVP geometry optimization for  $S_6^{\bullet-}$  in  $C_2$  open chain with PCM=DMF.**

```
1|1|UNPC-DESKTOP-3H3V0JT|FOpt|UPBE1PBE|def2QZVP|S6(1-,2)|HOME|01-Apr-2023|0||# opt upbelpbe/def2qzvp geom=connectivity g09defaults scrf=(solvent=n,n-dimethylformamide,pcm)||upBE0/def2-qzvp cyclic S6- radical anion in twisted C2 with PCM (DMF)||-1,2|S,-0.6606850602,2.0730707424,-0.6672204552|S,-0.8726876585,0.6127725982,0.719054788|S,0.8726876585,-0.6127725982,0.719054788|S,0.6606850602,-2.0730707424,-0.6672204552|S,-0.5444478326,-3.5109177147,-0.0518343471|S,0.5444478326,3.5109177147,-0.0518343471||Version=EM64W-G16RevB.01|State=2-A|HF=-2388.6505322|S2=0.774795|S2-1=0.|S2A=0.750198|RMSD=3.862e-009|RMSF=5.724e-005|Dipole=0.,0.,-0.0555616|Quadrupole=11.4140804,-22.8663018,11.4522214,-4.374502,0.,0.|PG=C02 [X(S6)]||@
```

**UPBE0/D3/Def2-QZVP geometry optimization for  $S_7^{\bullet-}$  in  $C_s$  chair**

```
1|1|UNPC-DESKTOP-3H3V0JT|FOpt|UPBE1PBE|def2QZVP|S7(1-,2)|HOME|10-May-2023|0||# opt geom=connectivity def2qzvp empiricaldispersion=gd3 upbelpbe||upbelpbe/D3/def2-qzvp optimization of chair S7 radical anion in Cs symmetry||-1,2|S,1.46970125,-1.66045214,0.|S,0.33393117,-1.3488371,1.67937066|S,0.33393117,0.70306527,2.03407462|S,-1.40271297,1.4759979,1.47305592|S,-1.40271297,1.4759979,-1.47305592|S,0.33393117,0.70306527,-2.03407462|S,0.33393117,-1.3488371,-1.67937066|Version=EM64W-G16RevB.01|State=2-A"|HF=-2786.6861315|S2=0.757255|S2-1=0.|S2A=0.750042|RMSD=7.439e-009|RMSF=3.086e-005|Dipole=0.8267154,-0.9135229,0.|Quadrupole=3.5194833,0.1833369,-3.7028202,5.0725199,0.,0.|PG=CS [SG(S1),X(S6)]||@
```

**UPBE0/D3/Def2-QZVP geometry optimization for  $S_7^{\bullet-}$  in  $C_s$  chair with PCM=DMF.**

```
1|1|UNPC-DESKTOP-3H3V0JT|FOpt|UPBE1PBE|def2QZVP|S7(1-,2)|HOME|20-Apr-2023|0||# opt upbelpbe/def2qzvp scrf=(solvent=n,n-dimethylformamide,pcm) geom=connectivity empiricaldispersion=gd3||upbelpbe/D3/def2-qzvp optimization of S7 radical anion in Cs symmetry in DMF||-1,2|S,0.25500168,-2.19722419,0.|S,-0.50135626,-1.28991066,1.67348101|S,0.68481507,0.3777353,2.02330872|S,-0.31095965,2.01074923,1.47216165|S,-0.31095965,2.01074923,-1.47216165|S,0.68481507,0.3777353,-2.02330872|S,-0.50135626,-1.28991066,-1.67348101||Version=EM64W-G16RevB.01|State=2-A"|HF=-2786.7547526|S2=0.756794|S2-1=0.|S2A=0.750037|RMSD=7.692e-009|RMSF=3.197e-005|Dipole=0.2341963,-2.0235687,0.|Quadrupole=6.4539197,-3.3721685,-3.0817512,0.4429869,0.,0.|PG=CS [SG(S1),X(S6)]||@
```

**Table S9** Gaussian archive entries for  $S_7^{\bullet-}$

**UPBE0/D3/Def2-QZVP geometry optimization for  $S_7^{\bullet-}$  in  $C_s$  boat**

```
1|1|UNPC-DESKTOP-3H3V0JT|FOpt|UPBE1PBE|def2QZVP|S7(1-,2)|HOME|10-May-2023|0||# opt geom=connectivity def2qzvp empiricaldispersion=gd3 upbelpbe|upbelpbe/D3/def2-qzvp optimization of boat S7 radical anion in Cs symmetry||-1,2|S,-0.95585623,1.6001999,1.59173732|S,-0.95585623,-0.3513521,1.79284459|S,1.00671168,-1.11444401,1.67279653|S,1.81000156,-0.26880758,0.|S,1.00671168,-1.11444401,-1.67279653|S,-0.95585623,-0.3513521,-1.79284459|S,-0.95585623,1.6001999,-1.59173732||Version=EM64W-G16RevB.01|State=2-A|HF=-2786.6840146|S2=0.758198|S2-1=0.|S2A=0.75005|RMSD=5.644e-009|RMSF=6.016e-005|Dipole=0.6366116,-0.954054,0.|Quadrupole=2.6613055,1.7873549,-4.4486604,4.4023355,0.,0.|PG=CS [SG(S1),X(S6)]||@
```

**UPBE0/D3/Def2-QZVP geometry optimization for  $S_7^{\bullet-}$  in  $C_s$  boat with PCM=DMF.**

```
1|1|UNPC-DESKTOP-3H3V0JT|FOpt|UPBE1PBE|def2QZVP|S7(1-,2)|HOME|10-May-2023|0||# opt scrf=(solvent=n,n-dimethylformamide,pcm) geom=connectivity def2qzvp empiricaldispersion=gd3 upbelpbe|upbelpbe/D3/def2-qzvp optimization of boat S7 radical anion in Cs symmetry with PCM=DMF||-1,2|S,-0.95503092,1.5995051,1.61434562|S,-0.95503092,-0.36279528,1.76982164|S,1.00319201,-1.10966278,1.66292587|S,1.81373966,-0.25409407,0.|S,1.00319201,-1.10966278,-1.66292587|S,-0.95503092,-0.36279528,-1.76982164|S,-0.95503092,1.5995051,-1.61434562||Version=EM64W-G16RevB.01|State=2-A|HF=-2786.753419|S2=0.757521|S2-1=0.|S2A=0.750044|RMSD=3.669e-009|RMSF=3.736e-005|Dipole=1.0683525,-1.6379131,0.|Quadrupole=2.9260862,1.0736794,-3.9997656,4.2952612,0.,0.|PG=CS [SG(S1),X(S6)]||@
```

**UPBE0/D3/Def2-QZVP geometry optimization for  $S_7^{\bullet-}$  in  $C_2$  open chain**

```
1|1|UNPC-DESKTOP-3H3V0JT|FOpt|UPBE1PBE|def2QZVP|S7(1-,2)|HOME|10-May-2023|0||# opt geom=connectivity def2qzvp empiricaldispersion=gd3 upbelpbe|upbelpbe/D3/def2-qzvp optimization of S7 radical anion chain in C2||-1,2|S,0.,0.,1.4828095838|S,1.0735532039,1.3247897898,0.314706902|S,0.0007590076,3.0834638651,0.2994094271|S,-1.0427650746,3.3148755646,-1.3555211261|S,1.0427650746,-3.3148755646,-1.3555211261|S,-0.0007590076,-3.0834638651,0.2994094271|S,-1.0735532039,-1.3247897898,0.314706902||Version=EM64W-G16RevB.01|State=2-B|HF=-2786.6760501|S2=0.773192|S2-1=0.|S2A=0.750177|RMSD=7.213e-009|RMSF=3.946e-006|Dipole=0.,0.,1.1207343|Quadrupole=10.7413595,-19.6959972,8.9546377,7.565309,0.,0.|PG=C02 [C2(S1),X(S6)]||@
```

**UPBE0/D3/Def2-QZVP geometry optimization for  $S_7^{\bullet-}$  in  $C_s$  open chain with PCM=DMF.**

```
1|1|UNPC-DESKTOP-3H3V0JT|FOpt|UPBE1PBE|def2QZVP|S7(1-,2)|HOME|11-May-2023|0||# opt scrf=(solvent=n,n-dimethylformamide,pcm) geom=connectivity def2qzvp empiricaldispersion=gd3 upbelpbe|upbelpbe/D3/def2-qzvp optimization of S7 radical anion chain in C2 with DMF||-1,2|S,0.,0.,1.7301342683|S,1.1333043298,1.2433855825,0.544052757|S,-0.0182443923,2.913850888,0.2022747667|S,-0.8070941892,2.8557481339,-1.6113946576|S,0.8070941892,-2.8557481339,-1.6113946576|S,0.0182443923,-2.913850888,0.2022747667|S,-1.1333043298,-1.2433855825,0.544052757||Version=EM64W-G16RevB.01|State=2-B|HF=-2786.7402724|S2=0.764572|S2-1=0.|S2A=0.750099|RMSD=9.798e-009|RMSF=1.225e-005|Dipole=0.,0.,2.0204201|Quadrupole=9.6068325,-14.3926378,4.7858053,6.2046684,0.,0.|PG=C02 [C2(S1),X(S6)]||@
```

**Table S10** Gaussian archive entries for  $S_8^{\bullet-}$

**UPBE0/D3/Def2-QZVP geometry optimization for  $S_8^{\bullet-}$  in  $C_{2v}$**

```
1|1|UNPC-DESKTOP-3H3V0JT|FOpt|UPBE1PBE|def2QZVP|S8(1-,2)|HOME|10-May-2023|0||# opt geom=connectivity def2qzvp empiricaldispersion=gd3 upbelpbe|upbelpbe/D3/def2-qzvp optimization of gas phase S8 radical anion in C2v symmetry||-1,2|S,0.,2.17511071,0.52226648|S,1.82831761,1.65915077,-0.45036909|S,2.666015,0.,0.37847169|S,1.82831761,-1.65915077,-0.45036909|S,0.,-2.17511071,0.52226648|S,-1.82831761,-1.65915077,-0.45036909|S,-2.666015,0.,0.37847169|S,-1.82831761,1.65915077,-0.45036909||Version=EM64W-G16RevB.01|State=2-B2|HF=-3184.774715|S2=0.762139|S2-1=0.|S2A=0.75009|RMSD=4.009e-009|RMSF=2.125e-005|Dipole=0.,0.,-0.0410218|Quadrupole=-4.0938364,-3.6646706,7.758507,0.,0.,0.|PG=C02V [SGV(S2),SGV'(S2),X(S4)]||@
```

**UPBE0/D3/Def2-QZVP geometry optimization for  $S_8^{\bullet-}$  in  $C_{2v}$  with PCM=DMF.**

```
1|1|UNPC-DESKTOP-3H3V0JT|FOpt|UPBE1PBE|def2QZVP|S8(1-,2)|HOME|11-May-2023|0||# opt scrf=(solvent=n,n-dimethylformamide,pcm) geom=connectivity def2qzvp empiricaldispersion=gd3 upbelpbe|upbelpbe/D3/def2-qzvp optimization of S8 radical anion in c2v symmetry with PCM (DMF)||-1,2|S,0.,2.1681063193,0.5179652322|S,1.8353341949,1.6559622976,-0.4512567532|S,2.6680555503,0.,0.3845482742|S,1.8353341949,-1.6559622976,-0.4512567532|S,0.,-2.1681063193,0.5179652322|S,-1.8353341949,-1.6559622976,-0.4512567532|S,-2.6680555503,0.,0.3845482742|S,-1.8353341949,1.6559622976,-0.4512567532||Version=EM64W-G16RevB.01|State=2-B2|HF=-3184.8375592|S2=0.762484|S2-1=0.|S2A=0.750094|RMSD=6.539e-009|RMSF=6.091e-006|Dipole=0.,0.,-0.095888|Quadrupole=-2.3003775,-4.0452195,6.345597,0.,0.,0.|PG=C02V [SGV(S2),SGV'(S2),X(S4)]||@
```

**UPBE0/D3/Def2-QZVP geometry optimization for  $S_8^{\bullet-}$  in  $C_2$  ring**

```
1|1|UNPC-TABLET|FOpt|UPBE1PBE|def2QZVP|S8(1-,2)|USER|20-Apr-2023|0||# opt upbelpbe/def2qzvp geom=connectivity empiricaldispersion=gd3|upbelpbe/D3/def2-qzvp gas phase optimization of S8 radical anion in C2 symmetry||-1,2|S,-0.5359532801,0.8764132204,-2.1372579943|S,0.3880323097,2.2983839459,-0.9678536055|S,-0.4747624089,2.3663146664,0.8999317636|S,0.5573430205,1.2685582006,2.2051798363|S,-0.5573430205,-1.2685581948,2.2051798396|S,0.4747624089,-2.366314664,0.8999317698|S,-0.3880323097,-2.2983839484,-0.9678535994|S,0.5359532801,-0.876413226,-2.137257992||Version=EM64W-G16RevB.01|State=2-B|HF=-3184.7825593|S2=0.756626|S2-1=0.|S2A=0.750037|RMSD=4.752e-009|RMSF=2.377e-005|Dipole=0.,0.,-1.3198095|Quadrupole=8.2263464,-3.69407,-4.5322764,-1.3861414,0.,0.|PG=C02 [X(S8)]||@
```

**UPBE0/D3/Def2-QZVP geometry optimization for  $S_8^{\bullet-}$  in  $C_2$  ring with PCM=DMF.**

```
1|1|UNPC-DESKTOP-3H3V0JT|FOpt|UPBE1PBE|def2QZVP|S8(1-,2)|HOME|20-Apr-2023|0||# opt upbelpbe/def2qzvp scrf=(solvent=n,n-dimethylformamide,pcm) geom=connectivity empiricaldispersion=gd3|upbelpbe/D3/def2-qzvp optimization of S8 radical anion in C2 symmetry with PCM||-1,2|S,-0.5456718526,0.8693272676,-2.1216075818|S,0.3878440629,2.2928828403,-0.970218443|S,-0.4780284692,2.3712879007,0.8925535721|S,0.5658523327,1.2706694238,2.1992724527|S,-0.5658523327,-1.2706694217,2.1992724539|S,0.4780284692,-2.3712878998,0.8925535744|S,-0.3878440629,-2.2928828412,-0.9702184407|S,0.5456718526,-0.8693272697,-2.121607581||Version=EM64W-G16RevB.01|State=2-B|HF=-3184.8484595|S2=0.75634|S2-1=0.|S2A=0.750034|RMSD=2.904e-009|RMSF=2.354e-005|Dipole=0.,0.,-2.2252462|Quadrupole=7.0241138,-2.2599708,-4.764143,-1.8504312,0.,0.|PG=C02 [X(S8)]||@
```

**Table S11** Gaussian archive entries for  $S_8^{\bullet-}$

**UPBE0/D3/Def2-QZVP geometry optimization for  $S_8^{\bullet-}$  in  $C_2$  chain**

```
1|1|UNPC-DESKTOP-3H3V0JT|FOpt|UPBE1PBE|def2QZVP|S8(1-,2)|HOME|11-May-2023|0||# opt geom=connectivity def2qzvp empiricaldispersion=gd3 upbelpbe||upbelpbe/D3/def2-qzvp optimization of S8- radical anion with C2 chain symmetry||-1,2|S,-0.9311516262,0.4100022087,-0.3985660813|S,-0.3923400231,3.6492238137,-0.2011488205|S,1.5685924541,3.8131580309,-0.320313958|S,-0.931093955,2.0079198195,0.9200288597|S,0.9311516262,-0.4100022087,-0.3985660813|S,0.931093955,-2.0079198195,0.9200288597|S,0.3923400231,-3.6492238137,-0.2011488205|S,-1.5685924541,-3.8131580309,-0.320313958||Version=EM64W-G16RevB.01|State=2-A|HF=-3184.7702695|S2=0.771324|S2-1=0.|S2A=0.750161|RMSD=8.282e-009|RMSF=6.457e-006|Dipole=0.,0.,0.2867827|Quadrupole=11.2955503,-27.1788969,15.8833466,-11.5876896,0.,0.|PG=C02 [X(S8)]||@
```

**UPBE0/D3/Def2-QZVP geometry optimization for  $S_8^{\bullet-}$  in  $C_{2v}$  chain with PCM=DMF.**

```
1|1|UNPC-DESKTOP-3H3V0JT|FOpt|UPBE1PBE|def2QZVP|S8(1-,2)|HOME|11-May-2023|0||# opt scrf=(solvent=n,n-dimethylformamide,pcm) geom=connectivity def2qzvp empiricaldispersion=gd3 upbelpbe||upbelpbe/D3/def2-qzvp S8- radical anion with C2 chain symmetry in DMF||-1,2|S,-0.938451103,0.3940221842,-0.380787261|S,-0.2933191159,3.5722012759,-0.199654267|S,1.6777239026,3.5134014924,-0.3579050967|S,-0.9418233466,1.9899266443,0.9383466245|S,0.938451103,-0.3940221842,-0.380787261|S,0.9418233466,-1.9899266443,0.9383466245|S,0.2933191159,-3.5722012759,-0.199654267|S,-1.6777239026,-3.5134014924,-0.3579050967||Version=EM64W-G16RevB.01|State=2-A|HF=-3184.8319582|S2=0.768243|S2-1=0.|S2A=0.750133|RMSD=4.580e-009|RMSF=1.076e-005|Dipole=0.,0.,0.4989251|Quadrupole=8.7442475,-22.952753,14.2085055,-14.8869579,0.,0.|PG=C02 [X(S8)]||@
```

**Table S12** Frequency calculations on S<sub>4</sub><sup>2-</sup> optimizationsUPBE0/D3/Def2-QZVP harmonic frequencies (cm<sup>-1</sup>) and IR intensities (km/mol):**S<sub>4</sub><sup>2-</sup> C<sub>2v</sub> symmetry optimization**

|                | <b>1</b> | <b>2</b> | <b>3</b> |
|----------------|----------|----------|----------|
|                | A2       | A1       | B2       |
| Frequencies -- | 93.4793  | 99.2629  | 297.1073 |
| IR Inten --    | 0.0000   | 0.2335   | 0.9587   |
|                | <b>4</b> | <b>5</b> | <b>6</b> |
|                | A1       | B2       | A1       |
| Frequencies -- | 372.2304 | 597.4382 | 629.4088 |
| IR Inten --    | 5.3568   | 226.4845 | 11.2075  |

**S<sub>4</sub><sup>2-</sup> C<sub>2h</sub> symmetry optimization**

|                | <b>1</b> | <b>2</b> | <b>3</b> |
|----------------|----------|----------|----------|
|                | AU       | BU       | AG       |
| Frequencies -- | 61.1152  | 116.6634 | 211.2402 |
| IR Inten --    | 2.5946   | 4.0829   | 0.0000   |
|                | <b>4</b> | <b>5</b> | <b>6</b> |
|                | AG       | BU       | AG       |
| Frequencies -- | 491.5503 | 571.9509 | 601.5166 |
| IR Inten --    | 0.0000   | 394.8908 | 0.0000   |

**S<sub>4</sub><sup>2-</sup> D<sub>2h</sub> symmetry optimization**

|                | <b>1</b>  | <b>2</b> | <b>3</b> |
|----------------|-----------|----------|----------|
|                | B2U       | AU       | AG       |
| Frequencies -- | -158.9028 | 186.1824 | 257.6270 |
| IR Inten --    | 26.1194   | 0.0000   | 0.0000   |
|                | <b>4</b>  | <b>5</b> | <b>6</b> |
|                | B3G       | B1U      | AG       |
| Frequencies -- | 297.1280  | 620.4993 | 690.2382 |
| IR Inten --    | 0.0000    | 246.9307 | 0.0000   |



**Table S13** Frequency calculations on S<sub>5</sub><sup>-</sup> optimizationsUPBE0/D3/Def2-QZVP harmonic frequencies (cm<sup>-1</sup>) and IR intensities (km/mol):**S<sub>5</sub><sup>-</sup> Cs symmetry optimization**

|                | <b>1</b> | <b>2</b> | <b>3</b> |
|----------------|----------|----------|----------|
|                | A'       | A''      | A'       |
| Frequencies -- | 25.0874  | 79.4777  | 179.7227 |
| IR Inten --    | 0.0345   | 0.8430   | 1.0969   |
|                | <b>4</b> | <b>5</b> | <b>6</b> |
|                | A''      | A'       | A''      |
| Frequencies -- | 183.8229 | 253.4055 | 380.3830 |
| IR Inten --    | 3.0693   | 0.5333   | 5.2795   |
|                | <b>7</b> | <b>8</b> | <b>9</b> |
|                | A'       | A''      | A'       |
| Frequencies -- | 465.9370 | 565.8056 | 591.0893 |
| IR Inten --    | 9.3689   | 308.6005 | 28.0072  |

**S<sub>5</sub><sup>-</sup> C<sub>2</sub> symmetry optimization**

|                | <b>1</b> | <b>2</b> | <b>3</b> |
|----------------|----------|----------|----------|
|                | B        | A        | A        |
| Frequencies -- | 45.5749  | 46.8312  | 142.8699 |
| IR Inten --    | 6.3423   | 1.6670   | 0.1016   |
|                | <b>4</b> | <b>5</b> | <b>6</b> |
|                | A        | B        | B        |
| Frequencies -- | 167.5055 | 231.4492 | 381.4829 |
| IR Inten --    | 0.4447   | 16.5141  | 2.2209   |
|                | <b>7</b> | <b>8</b> | <b>9</b> |
|                | A        | B        | A        |
| Frequencies -- | 475.2427 | 574.6505 | 598.9152 |
| IR Inten --    | 3.3375   | 608.9529 | 3.9688   |

**S<sub>5</sub><sup>-</sup> C<sub>2v</sub> symmetry optimization**

|                | <b>1</b>  | <b>2</b>  | <b>3</b> |
|----------------|-----------|-----------|----------|
|                | B1        | A2        | A1       |
| Frequencies -- | -179.6909 | -101.6574 | 70.4015  |
| IR Inten --    | 0.5337    | 0.0000    | 0.0409   |
|                | <b>4</b>  | <b>5</b>  | <b>6</b> |
|                | B2        | A1        | A1       |
| Frequencies -- | 130.6248  | 321.6024  | 350.9349 |
| IR Inten --    | 4.2669    | 0.8261    | 15.1348  |
|                | <b>7</b>  | <b>8</b>  | <b>9</b> |
|                | B2        | B2        | A1       |
| Frequencies -- | 380.5537  | 573.6585  | 628.8216 |
| IR Inten --    | 65.2056   | 306.3383  | 52.9086  |

**Table S14** Frequency calculations on S<sub>6</sub><sup>2-</sup> optimizationsUPBE0/D3/Def2-QZVP harmonic frequencies (cm<sup>-1</sup>) and IR intensities (km/mol):**S<sub>6</sub><sup>2-</sup> C<sub>2h</sub> symmetry optimization**

|                | <b>1</b>  | <b>2</b>  | <b>3</b>  |
|----------------|-----------|-----------|-----------|
|                | AU        | BG        | BU        |
| Frequencies -- | -274.2818 | 61.7422   | 134.0931  |
| IR Inten --    | 163.0819  | 0.0000    | 1.0085    |
|                | <b>4</b>  | <b>5</b>  | <b>6</b>  |
|                | AU        | AG        | AG        |
| Frequencies -- | 136.1077  | 175.9355  | 237.9972  |
| IR Inten --    | 0.4085    | 0.0000    | 0.0000    |
|                | <b>7</b>  | <b>8</b>  | <b>9</b>  |
|                | AG        | BU        | BU        |
| Frequencies -- | 267.0270  | 277.8538  | 492.5954  |
| IR Inten --    | 0.0000    | 2.1517    | 23.7686   |
|                | <b>10</b> | <b>11</b> | <b>12</b> |
|                | AU        | BG        | AG        |
| Frequencies -- | 501.9027  | 504.4655  | 516.7799  |
| IR Inten --    | 38.7977   | 0.0000    | 0.0000    |

**S<sub>6</sub><sup>2-</sup> C<sub>2</sub> (chair) symmetry optimization**

|                | <b>1</b>  | <b>2</b>  | <b>3</b>  |
|----------------|-----------|-----------|-----------|
|                | A         | B         | B         |
| Frequencies -- | 94.7215   | 96.5858   | 156.4278  |
| IR Inten --    | 0.2605    | 2.1264    | 4.8446    |
|                | <b>4</b>  | <b>5</b>  | <b>6</b>  |
|                | A         | A         | A         |
| Frequencies -- | 161.4525  | 193.2940  | 237.5156  |
| IR Inten --    | 1.6295    | 1.1399    | 1.9310    |
|                | <b>7</b>  | <b>8</b>  | <b>9</b>  |
|                | B         | A         | B         |
| Frequencies -- | 277.1331  | 412.7085  | 434.5716  |
| IR Inten --    | 0.4366    | 0.7120    | 0.8233    |
|                | <b>10</b> | <b>11</b> | <b>12</b> |
|                | A         | B         | A         |
| Frequencies -- | 468.8924  | 524.0344  | 535.0498  |
| IR Inten --    | 13.3616   | 40.6943   | 24.9367   |

**S<sub>6</sub><sup>2-</sup> C<sub>2</sub> (chain) symmetry optimization**

|                | <b>1</b>  | <b>2</b>  | <b>3</b>  |
|----------------|-----------|-----------|-----------|
|                | A         | B         | A         |
| Frequencies -- | 33.2114   | 40.8637   | 78.7024   |
| IR Inten --    | 1.4966    | 3.3952    | 0.0540    |
|                | <b>4</b>  | <b>5</b>  | <b>6</b>  |
|                | A         | B         | B         |
| Frequencies -- | 110.7337  | 193.9436  | 226.2836  |
| IR Inten --    | 0.0091    | 14.1353   | 0.2443    |
|                | <b>7</b>  | <b>8</b>  | <b>9</b>  |
|                | A         | A         | A         |
| Frequencies -- | 265.5562  | 305.3823  | 464.6657  |
| IR Inten --    | 2.0085    | 1.5687    | 0.6256    |
|                | <b>10</b> | <b>11</b> | <b>12</b> |
|                | B         | B         | A         |
| Frequencies -- | 481.8776  | 574.6453  | 594.1989  |
| IR Inten --    | 75.9763   | 772.2967  | 0.6326    |

**Table S15** Frequency calculations on S<sub>7</sub><sup>-</sup> optimizationsUPBE0/D3/Def2-QZVP harmonic frequencies (cm<sup>-1</sup>) and IR intensities (km/mol):**S<sub>7</sub><sup>-</sup> C<sub>s</sub> (chair) symmetry optimization**

|                |           |           |           |
|----------------|-----------|-----------|-----------|
|                | <b>1</b>  | <b>2</b>  | <b>3</b>  |
|                | A''       | A'        | A''       |
| Frequencies -- | 55.0680   | 67.3641   | 80.0563   |
| IR Inten --    | 0.1628    | 0.1122    | 0.2565    |
|                | <b>4</b>  | <b>5</b>  | <b>6</b>  |
|                | A'        | A''       | A'        |
| Frequencies -- | 147.6834  | 165.8997  | 170.3570  |
| IR Inten --    | 1.1496    | 6.6350    | 1.5937    |
|                | <b>7</b>  | <b>8</b>  | <b>9</b>  |
|                | A''       | A'        | A'        |
| Frequencies -- | 215.1894  | 218.4226  | 252.0467  |
| IR Inten --    | 1.1153    | 4.5561    | 1.0412    |
|                | 10        | 11        | 12        |
|                | A''       | A'        | A''       |
| Frequencies -- | 400.4765  | 412.2816  | 466.8077  |
| IR Inten --    | 2.5945    | 3.3965    | 0.8229    |
|                | <b>13</b> | <b>14</b> | <b>15</b> |
|                | A'        | A''       | A'        |
| Frequencies -- | 480.0905  | 555.7341  | 561.8168  |
| IR Inten --    | 5.5876    | 42.3251   | 43.5151   |

**S<sub>7</sub><sup>-</sup> C<sub>s</sub> (boat) symmetry optimization**

|                |           |           |           |
|----------------|-----------|-----------|-----------|
|                | <b>1</b>  | <b>2</b>  | <b>3</b>  |
|                | A''       | A''       | A'        |
| Frequencies -- | -42.9779  | 73.8807   | 83.3369   |
| IR Inten --    | 5.2028    | 6.0109    | 2.7333    |
|                | <b>4</b>  | <b>5</b>  | <b>6</b>  |
|                | A'        | A''       | A'        |
| Frequencies -- | 101.9495  | 137.4274  | 141.7754  |
| IR Inten --    | 5.1021    | 2.0189    | 0.3179    |
|                | <b>7</b>  | <b>8</b>  | <b>9</b>  |
|                | A'        | A''       | A'        |
| Frequencies -- | 238.2868  | 243.4486  | 303.7557  |
| IR Inten --    | 5.7008    | 1.2116    | 5.1609    |
|                | <b>10</b> | <b>11</b> | <b>12</b> |
|                | A'        | A''       | A''       |
| Frequencies -- | 406.0886  | 406.3419  | 456.1555  |
| IR Inten --    | 27.3847   | 22.2005   | 28.0512   |
|                | <b>13</b> | <b>14</b> | <b>15</b> |
|                | A'        | A''       | A'        |
| Frequencies -- | 493.6848  | 548.5758  | 585.2342  |
| IR Inten --    | 3.7015    | 443.5795  | 92.8731   |

**Table S16** Frequency calculations on S<sub>7</sub><sup>-</sup> and S<sub>8</sub><sup>-</sup> optimizationsUPBE0/D3/Def2-QZVP harmonic frequencies (cm<sup>-1</sup>) and IR intensities (km/mol):**S<sub>7</sub><sup>-</sup> C<sub>2</sub> (chain) symmetry optimization**

|                | <b>1</b>  | <b>2</b>  | <b>3</b>  |
|----------------|-----------|-----------|-----------|
|                | A         | A         | B         |
| Frequencies -- | 22.8317   | 39.9410   | 45.9331   |
| IR Inten --    | 1.1174    | 0.1441    | 0.2275    |
|                | <b>4</b>  | <b>5</b>  | <b>6</b>  |
|                | B         | A         | A         |
| Frequencies -- | 56.7017   | 135.3776  | 171.4867  |
| IR Inten --    | 5.2890    | 0.7966    | 1.0865    |
|                | <b>7</b>  | <b>8</b>  | <b>9</b>  |
|                | B         | B         | A         |
| Frequencies -- | 200.1927  | 213.4079  | 239.9480  |
| IR Inten --    | 44.8596   | 8.2971    | 1.2740    |
|                | <b>10</b> | <b>11</b> | <b>12</b> |
|                | B         | A         | B         |
| Frequencies -- | 392.1918  | 426.2889  | 466.2292  |
| IR Inten --    | 72.2840   | 0.0819    | 50.9643   |
|                | <b>13</b> | <b>14</b> | <b>15</b> |
|                | A         | B         | A         |
| Frequencies -- | 471.3154  | 572.7738  | 590.5036  |
| IR Inten --    | 1.0272    | 776.7433  | 29.0675   |

**S<sub>8</sub><sup>-</sup> C<sub>2v</sub> (crown) symmetry optimization**

|                | <b>1</b>  | <b>2</b>  | <b>3</b>  |
|----------------|-----------|-----------|-----------|
|                | A''       | A''       | A'        |
| Frequencies -- | -215.2462 | 51.8209   | 67.1894   |
| IR Inten --    | 64.3470   | 0.2155    | 2.1094    |
|                | <b>4</b>  | <b>5</b>  | <b>6</b>  |
|                | A''       | A'        | A'        |
| Frequencies -- | 113.0806  | 117.3600  | 158.5904  |
| IR Inten --    | 0.0646    | 2.0549    | 12.0910   |
|                | <b>7</b>  | <b>8</b>  | <b>9</b>  |
|                | A''       | A'        | A'        |
| Frequencies -- | 181.9323  | 207.1759  | 213.5920  |
| IR Inten --    | 9.2254    | 0.9629    | 0.2477    |
|                | <b>10</b> | <b>11</b> | <b>12</b> |
|                | A'        | A''       | A'        |
| Frequencies -- | 233.3355  | 241.3447  | 329.3562  |
| IR Inten --    | 1.5167    | 0.0205    | 11.4395   |
|                | <b>13</b> | <b>14</b> | <b>15</b> |
|                | A''       | A'        | A'        |
| Frequencies -- | 394.5500  | 441.2564  | 462.7533  |
| IR Inten --    | 0.4552    | 3.0782    | 14.0967   |
|                | <b>16</b> | <b>17</b> | <b>18</b> |
|                | A''       | A''       | A'        |
| Frequencies -- | 463.9082  | 499.4670  | 505.1848  |
| IR Inten --    | 1.7017    | 4.3092    | 11.1877   |

**Table S17** Frequency calculations on S<sub>8</sub><sup>•-</sup> optimizationsUPBE0/D3/Def2-QZVP harmonic frequencies (cm<sup>-1</sup>) and IR intensities (km/mol):**S<sub>8</sub><sup>•-</sup> C<sub>2</sub> (crown) symmetry optimization**

|                | <b>1</b>  | <b>2</b>  | <b>3</b>  |
|----------------|-----------|-----------|-----------|
|                | A         | B         | B         |
| Frequencies -- | 49.4216   | 57.0518   | 59.3085   |
| IR Inten --    | 0.8422    | 1.0937    | 1.5085    |
|                | <b>4</b>  | <b>5</b>  | <b>6</b>  |
|                | A         | A         | B         |
| Frequencies -- | 80.9170   | 154.6850  | 171.8857  |
| IR Inten --    | 0.0549    | 6.1181    | 10.9404   |
|                | <b>7</b>  | <b>8</b>  | <b>9</b>  |
|                | A         | A         | B         |
| Frequencies -- | 178.5849  | 203.5001  | 209.6522  |
| IR Inten --    | 0.7127    | 8.5594    | 7.5327    |
|                | <b>10</b> | <b>11</b> | <b>12</b> |
|                | B         | A         | A         |
| Frequencies -- | 235.1542  | 242.9119  | 429.0432  |
| IR Inten --    | 6.1976    | 0.4274    | 0.4327    |
|                | <b>13</b> | <b>14</b> | <b>15</b> |
|                | B         | A         | B         |
| Frequencies -- | 436.4123  | 469.0929  | 473.0558  |
| IR Inten --    | 5.6644    | 0.0048    | 2.7528    |
|                | <b>16</b> | <b>17</b> | <b>18</b> |
|                | A         | B         | A         |
| Frequencies -- | 478.4379  | 528.0651  | 534.0523  |
| IR Inten --    | 7.5720    | 60.7796   | 82.5429   |

**S<sub>8</sub><sup>•-</sup> C<sub>2</sub> (chain) symmetry optimization**

|                | <b>1</b>  | <b>2</b>  | <b>3</b>    |
|----------------|-----------|-----------|-------------|
|                | A         | B         | A           |
| Frequencies -- | 21.7359   | 41.3018   | 42.3835     |
| IR Inten --    | 3.2937    | 1.3751    | 0.1205      |
|                | <b>4</b>  | <b>5</b>  | <b>6</b>    |
|                | A         | B         | A           |
| Frequencies -- | 58.5326   | 64.2764   | 136.1222    |
| IR Inten --    | 0.5991    | 16.7639   | 0.0625      |
|                | <b>7</b>  | <b>8</b>  | <b>9</b>    |
|                | B         | A         | B           |
| Frequencies -- | 156.0179  | 202.7239  | 213.0387    |
| IR Inten --    | 177.4056  | 0.2190    | 77.8752     |
|                | <b>10</b> | <b>11</b> | <b>12</b>   |
|                | A         | B         | A           |
| Frequencies -- | 258.4979  | 273.7691  | 398.3972    |
| IR Inten --    | 2.6225    | 51.3383   | 0.3340      |
|                | <b>13</b> | <b>14</b> | <b>15</b>   |
|                | B         | A         | B           |
| Frequencies -- | 413.7622  | 471.5814  | 477.0589    |
| IR Inten --    | 456.7368  | 7.7087    | 93.6209     |
|                | <b>16</b> | <b>17</b> | <b>18</b>   |
|                | A         | A         | B           |
| Frequencies -- | 490.6968  | 577.8644  | 845.1786    |
| IR Inten --    | 1.0823    | 8.0888    | 142811.3466 |
